# Supplementary material for: Diversity of Indian Barnacles in Marine Provinces and Ecoregions of the Indian Ocean
Source: Frontiers journal article supplement (doi:10.3389/fmars.2021.657651), 2021-06-16
Supplement: Data_Sheet_1.XLSX [file Data_Sheet_1.XLSX]

## Sheet: 工作表1
Species	Western India Ecoregion	South India and Sri Lanka Ecoregion	Maldives Ecoregion	Eastern India Ecoregion (81 species)	Northern Bay of Bengal Ecoregion	Andaman and Nicobar Islands Ecoregion
Ibla cumingi Darwin, 1851	1	0	1	1	0	1
Oxynaspis celata Darwin, 1852	0	0	0	1	1	0
Oxynaspis indica Annandale, 1909	0	1	0	0	1	0
Dianajonesia amygdalum (Aurivillius, 1894)	0	0	0	1	0	1
Dianajonesia bathynomid (Annandale, 1906)	0	0	0	0	1	0
Dianajonesia fissum (Darwin, 1851)	0	0	0	0	0	1
Dianajonesia minutum (Gruvel, 1902)	0	1	0	1	0	1
Dianajonesia tridens (Aurivillius, 1894)	0	0	0	1	1	0
Dichelaspis orthogonia (Darwin, 1852)	0	0	0	0	1	0
Glyptelasma gigas (Annandale,1916)	0	0	0	0	1	0
Glyptelasma gracile (Hoek,1883)	0	1	0	0	0	1
Megalasma carinodentatum Weltner, 1894	0	0	0	0	1	0
Megalasma minus Annandale, 1906	0	1	1	0	0	1
Octolasmis angulate (Aurivillius, 1894)	1	1	0	1	0	0
Octolasmis cor (Aurivillius, 1892)	1	1	0	1	1	0
Octolasmis cor var. b (Gruvel), 1902	0	0	0	1	0	0
Octolasmis cor var. c (Gruvel), 1902	0	0	0	1	0	0
Octolasmis geryonophila Pilsbry, 1907	0	0	1	0	0	0
Octolasmis grayi (Darwin, 1851)	1	1	0	1	1	1
Octolasmis grayii var. pernuda (Annandale, 1909)	0	0	0	1	0	0
Octolasmis lowei (Darwin, 1852)	0	0	0	1	0	1
Octolasmis neptuni (MacDonald, 1869)	0	0	0	1	0	0
Octolasmis nierstraszi (Hoek, 1907)	0	0	0	1	0	0
Octolasmis rhinoceros (Annandale, 1909)	0	0	0	1	0	0
Octolasmis stella (Annandale, 1909)	0	1	0	1	0	1
Octolasmis warwickii Gray, 1825	1	0	0	1	1	0
Poecilasma dubium Hoek, 1907	0	0	0	1	0	0
Poecilasma kaempferi Darwin, 1852	0	1	0	0	0	1
Dianajonesia amygdalum (Aurivillius, 1894)	0	0	0	1	0	0
Temnaspis fissum (Darwin, 1851)	0	0	0	0	0	1
Conchoderma indicum Daniel, 1953	0	1	0	0	0	1
Conchoderma virgatum Spengler, 1790	1	0	1	1	1	1
Dosima guanamuthui (Daniel, 1971)	0	0	0	0	0	1
Hyalolepas bengalensis Daniel, 1952	0	1	0	1	0	0
Lepas anserifera Linnaeus, 1767	1	1	0	1	1	1
Lepas anatifera Linnaeus, 1758	1	0	0	1	1	1
Lepas pectinate Spengler, 1793	0	0	0	1	0	1
Lepas indica Annandale, 1909	0	0	0	1	1	0
Alepas pacifica Pilsbry, 1907	0	1	0	0	0	1
Heteralepas cornuta (Darwin, 1851)	0	0	0	0	0	1
Heteralepas japonica (Aurivillius, 1892)	0	0	0	1	0	0
Heteralepas nicobarica Annandale, 1909	0	0	0	0	0	1
Paralepas xenophorae (Annandale, 1906)	0	1	0	0	0	0
Lithotrya nicobarica Reinhardt, 1850	0	0	0	0	0	1
Calantica kampeni (Annandale, 1909)	0	0	0	0	0	1
Euscalpellum rostratum (Darwin, 1851)	1	0	0	0	0	1
Euscalpellum squamuliferum (Weltner, 1894)	0	0	0	1	0	1
Smilium acutum (Hoek, 1883)	0	0	0	0	0	1
Smilium sinense (Annandale, 1910)	0	0	0	0	0	1
Alcockianum alcockianum (Annandale, 1906)	0	1	0	0	0	1
Amigdoscalpellum costellatum (Withers, 1935)	0	0	0	1	0	0
Amigdoscalpellum tenue (Hoek, 1883)	0	0	0	1	0	0
Annandaleum gruvelii (Annandale, 1906)	0	1	1	0	0	0
Annandaleum gruvelii quadratum Annandale, 1906	0	1	0	0	0	0
Annandaleum laccadivicum (Annandale, 1906)	0	0	1	0	0	0
Annandaleum laccadivicum laccadivicum (Annandale, 1906)	0	1	1	1	0	0
Annandaleum lambda (Annandale, 1910)	0	0	0	0	0	1
Arcoscalpellum sociabile (Annandale, 1905)	0	0	0	0	0	1
Arcoscalpellum woodmasoni (Annandale, 1906)	0	0	0	0	0	1
Catherinum novaezelandiae (Hoek, 1883)	0	0	0	0	0	1
Catherinum trapezoideum (Hoek,1907)	0	1	0	0	0	0
Scalpellum (Smilium) bengalens (Annandale, 1906)	0	0	0	1	0	0
Scalpellum stearnsi Pilsbry, 1890	0	0	0	0	0	1
Teloscalpellum pacificum (Pilsbry, 1907)	1	1	0	1	0	0
Chthamalus barnesi Achituv and Safriel, 1980	1	0	0	0	0	0
Chthamalus malayensis Pilsbry, 1916	0	1	1	1	1	1
Euraphia hembeli (Conrad, 1837)	0	0	1	0	0	0
Microeuraphia withersi (Pilsbry, 1916)	1	0	0	0	1	0
Chelonibia caretta (Spengler, 1790)	0	0	1	1	0	0
Chelonibia testudinaria (Linnaeus, 1758)	1	1	1	1	1	1
Platylepas decorata (Darwin, 1854)	0	0	0	0	0	1
Platylepas hexastylos (Fabricius, 1798)	1	0	0	1	0	0
Platylepas indicus Daniel, 1958	0	0	0	1	0	1
Platylepas ophiophila Lanchester, 1902	0	0	0	1	0	0
Stomatolepas elegans (Costa,1838)	0	0	0	1	0	0
Xenobalanus globicipitis (Steenstrup,1852)	1	0	0	1	0	0
Neonrosella vitiata (Darwin, 1854)	0	0	0	0	0	1
Tetraclitella karandei Ross, 1971	1	0	0	0	0	0
Tetraclitella purpurascens (Wood, 1815)	1	0	0	1	0	0
Tetraclita ehsani Chan, Shahdadi and Sari, 2011	1	0	0	0	0	0
Tetraclita japonica formosana (Hiro, 1939)	0	0	0	0	0	1
Tetraclita squamosa rufotincta Pilsbry, 1916	1	0	0	0	0	0
Tetraclita squamosa (Bruguière, 1789)	0	1	0	0	0	1
Yamaguchiella coerulescens (Spengler, 1790)	0	0	0	0	1	0
Acasta cyathus Darwin, 1854	0	1	0	0	0	0
Acasta fenestrata (Darwin, 1854)	0	0	0	1	1	0
Acasta navicula (Darwin, 1854)	0	0	0	1	0	1
Acasta sulcata Lamarck, 1818	0	1	1	0	0	0
Acasta sulcata akanthosa (Daniel, 1955). P	0	0	0	1	0	0
Armatobalanus allium (Darwin, 1854)	0	0	0	0	1	1
Armatobalanus arcuatus Hoek, 1913	0	0	0	0	0	1
Armatobalanus cepa (Darwin, 1854)	0	1	0	1	0	0
Conopea calceola (Ellis, 1758)	0	0	0	1	0	0
Conopea cymbiformis (Darwin, 1854)	0	0	0	1	0	0
Eoatria funiculorum (Annandale, 1906)	0	1	0	0	0	0
Balanus furniculorum
Euacasta porata (Nilsson-Cantell, 1921)	0	1	0	1	0	0
Membranobalanus longirostrum (Hoek, 1913)	0	1	0	1	0	0
Multatria terebratus (Darwin, 1854)	0	1	0	1	0	0
Multatria terebratus radicifer (Annandale, 1924)	0	0	0	0	1	0
Neoacasta glans (Lamarck, 1818)	0	0	0	1	0	0
Neoacasta laevigata Gray (, 1825)	0	0	0	0	0	1
Pectinoacasta pectinipes (Pilsbry, 1912)	0	0	0	0	0	1
Semibalanus balanoides	0	0	0	1	0	0
Semibalanus madrasensis (Daniel, 1958)	0	0	0	1	0	0
Semibalanus sinnurensis (Daniel, 1962)	0	0	0	1	0	0
Solidobalanus ciliates (Hoek, 1913)	1	1	0	0	0	1
Solidobalanus socialis (Hoek, 1883)	0	1	0	1	0	0
Striatobalanus amaryllis (Darwin, 1854)	1	1	0	1	1	0
Striatobalanus tenuis (Hoek,1883)	1	0	0	1	1	1
Amphibalanus amphitrite (Darwin, 1854)	1	1	0	1	1	1
Amphibalanus cirratus (Darwin,1854)	0	0	0	1	1	0
Amphibalanus eburneus (Gould, 1841)	0	0	0	1	0	0
Amphibalanus improvises (Darwin, 1854)	0	0	0	1	0	0
Amphibalanus reticulatus (Utinomi, 1967)	1	0	0	1	0	0
Amphibalanus variegatus (Darwin, 1854)	1	0	0	1	1	1
Amphibalanus venustus (Darwin, 1854)	1	1	0	1	1	1
Balanus calidus Pilsbry, 1916	1	0	0	1	0	0
Balanus crenatus Bruguière, 1789	1	0	0	0	0	1
Balanus hoekianus Pilsbry, 1911	0	0	0	1	0	0
Fistulobalanus kondakovi (Tarasov & Zevina, 1957)	1	0	0	1	0	0
Fistulobalanus pallidus (Darwin, 1854)	1	0	0	0	0	0
Fistulobalanus patelliformis (Bruguière, 1789)	0	0	0	1	1	0
Megabalanus occator (Darwin, 1854)	0	0	0	1	0	1
Megabalanus tintinnabulum (Linnaeus, 1758)	1	1	0	1	1	1
Megabalanus validus Darwin, 1854	0	1	0	0	0	1
Megabalanus volcano (Pilsbry, 1916)	0	1	0	1	0	1
Notomegabalanus squillae	0	0	0	1	0	0
Pyrgomina	0	0	0	1	0	0
Cantellius euspinulosum (Broch, 1931)	0	0	0	0	1	1
Cantellius gregarius (Sowerby, 1823)	0	0	0	0	0	1
Cantellius transversalis (Nilsson-Cantell, 1938)	0	0	0	0	0	1
Cantellius secundus (Broch, 1931)	0	0	0	0	0	1
Creusia spinulosa Leach, 1818	0	0	0	0	0	1
Darwiniella conjugatum (Darwin, 1854)	0	1	0	1	0	0
Galkinius indica (Annandale, 1924)	0	0	0	1	0	0
Hoekia monticulariae (Gray, 1831)	0	0	0	0	1	0
Nobia grandis Sowerby, 1839	0	0	0	0	1	1
Pyrgoma cancellatum Leach, 1818	0	1	0	0	0	0
Pyrgopsella annandalei (Gruvel, 1906)	0	0	0	0	0	1
Savignium crenatum (Sowerby, 1823)	0	0	0	0	1	0
Trevathana dentata (Darwin, 1854)	0	0	0	0	1	0
Wanella milleporae (Darwin, 1854)	0	0	0	1	0	0
Altiverruca plana (Gruvel, 1907)	0	0	0	0	0	1
Altiverruca regularis (Nilsson-Cantell, 1929)	0	0	0	0	0	1
Cristallina verruca cristallina (Gruvel, 1907)	0	0	0	0	0	1
Cristallina verruca regularis (Nilsson-Cantell, 1929)	0	0	0	0	0	1
Newmaniverruca multicostata (Gruvel, 1907)	0	0	0	0	0	1
Rostratoverruca koehleri (Gruvel,1907)	0	0	0	0	0	1
Sacculina carcini Thompson, 1836	0	0	0	1	0	0
